# Supplementary material for: Development of a Monoclonal Antibody-Based Indirect Competitive Enzyme-Linked Immunosorbent Assay for the Rapid Detection of Gallic Acid
Source: MDPI journal article supplement (doi:10.3390/bios14040182), 2024-04-09
Supplement: s1 [file s1]

# Development of a Monoclonal Antibody-Based Indirect Competitive Enzyme-Linked Immunosorbent Assay for the Rapid Detection of Gallic Acid

Jiajing Duan <sup>†</sup>, Xiuxia Zheng <sup>†</sup>, Ran Tao, Long Li, Fengzhong Wang, Yufeng Sun <sup>\*</sup> and Bei Fan

Institute of Food Science and Technology, Chinese Academy of Agricultural Sciences, Beijing 100193, China; duanjiajing2021@163.com (J.D.); 18646654981@163.com (X.Z.); ran.tao5@mail.mcgill.ca (R.T.); llzgnydx@163.com (L.L.); wangfengzhong@sina.com (F.W.); fanbei@caas.cn (B.F.)

<sup>\*</sup> Correspondence: yufengsuncaas@163.com

<sup>†</sup> These authors contributed equally to this work.

**Table S1.** Antibody potency detection.

| Dilution factor | P/N value |
|-----------------|-----------|
| 500             | 42.17     |
| 1,500           | 20.90     |
| 4,500           | 8.83      |
| 13,500          | 4.21      |
| 40,500          | 2.12      |
| 121,500         | 1.33      |
| 364,500         | 0.87      |

**Table S2.** Antibody subtype detection.

| Antibody subtype  | IgG1  | IgG2a | IgG2b | IgG3  | IgM   | IgA   |
|-------------------|-------|-------|-------|-------|-------|-------|
| OD <sub>450</sub> | 1.423 | 1.100 | 2.343 | 0.789 | 0.946 | 0.498 |

**Table S3.** Determination of the optimum concentration of coating antigen.

| Coating antigen concentration (μg/mL) | A <sub>450</sub> |
|---------------------------------------|------------------|
| 1                                     | 1.146            |
| 0.5                                   | 1.043            |
| 0.25                                  | 0.951            |
| 0.125                                 | 0.734            |
| 0.0625                                | 0.649            |
| 0.03125                               | 0.580            |

**Table S4.** Determination of the optimum concentration of mAb.

| mAb concentration (μg/mL) | Maximum competitive inhibition rate |
|---------------------------|-------------------------------------|
| 2                         | 1.29                                |
| 0.67                      | 1.29                                |
| 0.22                      | 0.91                                |
| 0.074                     | 0.75                                |
| 0.025                     | 0.62                                |
